# Supplementary material
Source: PubMed Central journal article supplement (PMC3761575)
Supplement: 1309840110_pnas.201309840SI.pdf [file 1309840110_pnas.201309840SI.pdf]

# Supporting Information

Edholm et al. 10.1073/pnas.1309840110

## SI Materials and Methods

**Experimental Animals.** Transgenic *Xenopus laevis* was generated using I-SceI meganuclease as previously described (1). Briefly, the I-SceI-*Xenopus* nonclassical gene 10 (XNC10) shRNA-GFP expression vector was constructed by cloning the GFP reporter flanked by the 18-bp I-SceI recognition sites into the I-SceI-pB-SIISk+ vector (provided by R. Grainger, University of Virginia, Charlottesville, VA). Subsequently, the XNC10 shRNA under the control of the hU6 Pol III promoter was cloned into the I-SceI-GFP vector. Before microinjection, females were primed with human chronic gonadotropin (Sigma), and eggs were fertilized, dejellied, and injected with 80 pg I-SceI meganuclease-digested XNC10shRNA-GFP expression vector as previously described (1). After injection, all embryos were incubated at 13 °C for 4 h to delay cell division, transferred to 0.3× modified Barth's saline supplemented with 5 µg/mL gentamicin, and reared at 18 °C until hatching. Transgenic larvae were screened for GFP expression at developmental stage 56 using an SMZ1500 Nikon stereomicroscope.

**Construction and Production of b2m-XNC10 Tetrameric Complexes.** Beta 2 microglobulin (b2m) was engineered with a 23-aa Gly-rich C-terminal flexible linker (GGGGSGSGSGGGSSGTELGSGS). Soluble XNC10 encompassing the  $\alpha$ 1- $\alpha$ 3 domains and lacking the transmembrane segment and cytoplasmic domain was engineered with a substrate sequence (GLNDIFEAQKIEWH) for BirA site-specific biotinylation at the end of the  $\alpha$ 3 domain. The b2m-linker-XNC10 construct was generated by sequential cloning into the pMIBV5-HisA expression vector (Invitrogen) with a polyhistidine region and a V5 epitope tag at the C terminus. It was transfected into Sf9 insect cells using the Cellfectin reagent (Invitrogen) according to the manufacturer's protocol. After 2 wk of Blasticidin selection, stably transfected cells were expanded for large-scale protein production. Monomeric b2m-linker-XNC10 (b2m-linker-XNC10) was purified by Ni-NTA-Agarose Chromatography (Qiagen) using high-stringency conditions (50 mM NaH<sub>2</sub>PO<sub>4</sub>, 500 mM NaCl, 100 mM Imidazole, 0.5% Tween, pH 8.0), eluted in 50 mM NaH<sub>2</sub>PO<sub>4</sub>, 500 mM NaCl, and 250 mM Imidazole, pH 8.0, dialyzed against 10 mM Tris-HCl, pH 7.4, and concentrated to 1 µg/µL using Amicon Ultra Centrifugal Filter (Millipore). BirA enzymatic biotinylation was performed for 16–18 h at 30 °C according to the manufacturer's protocol (Avidity), and the purified biotinylated proteins were extensively dialyzed against amphibian PBS, pH 7.5, to remove any unbound biotin. The specificity and degree of biotinylation were verified by Western blot analysis using HRP-conjugated streptavidin (Pierce). XNC10 tetramers were generated by incubating b2m-linker-XNC10 with fluorochrome-labeled streptavidin at a 5:1 ratio at room temperature for 4 h before use in flow cytometry analysis.

**Conditions for Flow Cytometry.** For flow cytometry, cells ( $0.25 \times 10^6$ ) were stained with 5 µg XNC10-tetramer (XNC10-T) -allophycocyanin (APC) for 30 min at 4 °C followed by *Xenopus* anti-CD8 (AM22), -CD5 (pan T-cell marker 2B1), or -MHC class II (AM20) mAbs and FITC-conjugated goat anti-mouse secondary Abs (Southern Biotech); 50,000 events were collected with an

FACSCanto II (BD Bioscience) and analyzed using FlowJo software (Tree Star Inc.). Dead cells were excluded using Propidium iodide (BD Pharmingen). Splenocytes were FACS sorted (F-Aria-18; BD Bioscience), and subsamples from each sorted fraction were analyzed by flow cytometry to verify sorting purity.

**Conditions for Quantitative PCR, RT-PCR, and 5'-RACE.** RNA was prepared using TRIzol Reagent (Invitrogen) and treated with DNase (Ambion; Life Technologies) according to the manufacturer's protocol; 500 ng total RNA were transcribed into cDNA with iScript reverse transcriptase using a mix of oligo-dT and random hexamer primers (Bio-Rad). Typical parameters for RT-PCR were 5 min at 94 °C followed by 30 cycles of 94 °C for 30 s, 59 °C for 30 s, and 72 °C for 1 min with a final extension cycle of 72 °C for 10 min. For nested reactions, 1 µL initial PCR reaction was used as a template in the subsequent PCR. Quantitative PCR parameters were 2 min at 95 °C followed by 40 cycles of 95 °C for 15 s and 60 °C for 1 min. Quantitative PCR gene expression was performed using the  $\Delta\Delta$ CT method with the ABI 7300 Real-Time PCR System and PerfeCta SYBR Green FastMix ROX. Expression analyses of XNC10 and invariant T cell receptor (iTCR) $\alpha$  chain were normalized to the GAPDH endogenous control against the lowest observed tissue expression. Analysis was performed using the ABI sequence detection system software, and all primers were validated before use (Table S7). PCR products were cloned into pGEM-T (Promega) and sequenced. The IMG/DomainGapAlign TOOL (<http://imgt.cines.fr>) or when possible, IMG/V-QUEST (2) was used to determine complementarily determining regions (CDRs), framework, and strand delimitations. For 5'-rapid amplification of cDNA ends (RACE) analysis, RNA was isolated with the SMARTer RACE cDNA Amplification Kit (Clontech Laboratories) and amplified with either a T cell receptor (TCR) $\alpha$  or TCR constant region-specific primers.

**TCR $\alpha$  Repertoire Sequence Analysis.** The 454 GS junior reads were split by barcode identification into three populations using the fastx barcode splitter from fastx-toolkit ([http://hannonlab.cshl.edu/fastx\\_toolkit/index.html](http://hannonlab.cshl.edu/fastx_toolkit/index.html)). Any reads <200 bp in length were removed using the fastq\_quality\_trimmer from the fastx-toolkit with the following parameter: -t 0 -l 200. The remaining reads were screened for the anchoring C $\alpha$  region using BLASTn version 2.2.27 (3) with the following parameters: -outfmt 6 -evalue 1e-5 -perc\_identity 95. To determine the sequence identity, known V $\alpha$  and J $\alpha$  sequences were used as the query in a BLAST search with the following parameters: -outfmt 6 -evalue 1e-10 -perc\_identity 95, where the C $\alpha$ -anchored region and size-selected reads were the subject database. Initial clustering of the selected sequences was performed using uSearch version 6.0.307 with a >85% cutoff (4). A Perl script was used to correlate the V $\alpha$  and J $\alpha$  BLAST identification of each sequence and the clusters obtained with uSearch; therefore, the frequency of each V $\alpha$  and J $\alpha$  region was recorded for each cluster. All major clusters were then reclustered with 100% and >95% identify thresholds and correlated with the V $\alpha$  and J $\alpha$  BLAST identification using the same Perl script described.

1. Nedelkovska H, Edholm ES, Haynes N, Robert J (2013) Effective RNAi-mediated  $\beta$ 2-microglobulin loss of function by transgenesis in *Xenopus laevis*. *Biol Open* 2(3):335–342.  
2. Lefranc MP, et al. (2003) IMGT unique numbering for immunoglobulin and T cell receptor variable domains and Ig superfamily V-like domains. *Dev Comp Immunol* 27(1):55–77.

3. Altschul SF, Gish W, Miller W, Myers EW, Lipman DJ (1990) Basic local alignment search tool. *J Mol Biol* 215(3):403–410.  
4. Edgar RC (2010) Search and clustering orders of magnitude faster than BLAST. *Bioinformatics* 26(19):2460–2461.

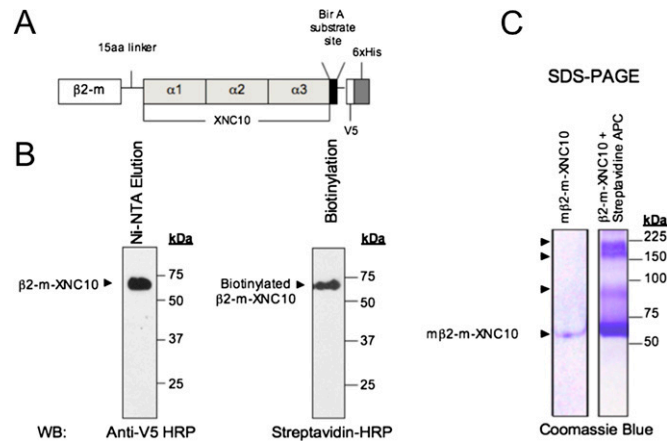

**Fig. 51.** Design and production of an *X. laevis* class Ib XNC10 tetramer. (A) Schematic representation of the *b2m*-linker-XNC10 construct used to generate 2-m-XNC10 monomers. (B) *b2m*-XNC10 protein was purified from concentrated SF9 insect culture supernatant under native conditions using Ni-NTA-agarose; the eluted proteins were separated by reducing 10% (vol/vol) SDS/PAGE, transferred to nitrocellulose membranes, and visualized by Western blot using anti-V5-HRP. Eluted 2-m-XNC10 protein was dialyzed against 10 mM Tris-HCl, subjected to Bir A enzymatic biotinylation, dialyzed extensively against amphibian PBS, and analyzed, except where visualized using streptavidine-HRP. (C) Monomeric biotinylated 2-m-XNC10 was concentrated to 1 g/L, incubated with streptavidin-APC at a 5:1 molar ratio, and run on an 8% SDS/PAGE gel under nonreducing conditions. Proteins were visualized using Coomassie Blue stain. Arrowheads indicate appropriately sized 2-m-XNC10 proteins. WB, western blot.

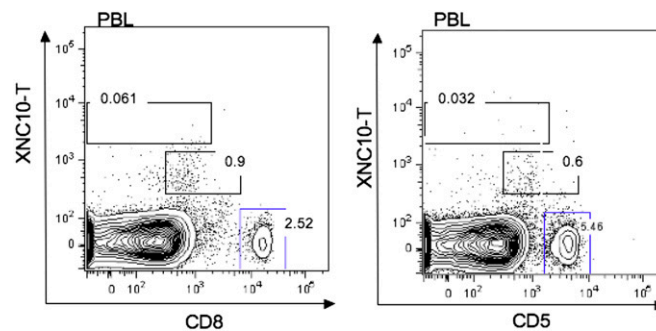

**Fig. 52.** Identification of XNC10-T<sup>+</sup> T-cell populations in the peripheral blood leukocytes (PBL) of adult *X. laevis*. Flow cytometry of live PBL isolated from adult unprimed *X. laevis* and double stained with streptavidine-APC-conjugated XNC10-T and CD8 or CD5-specific mAbs. Percentage of positive staining cells is indicated in the scatterplot. Data are representative of three independent experiments.

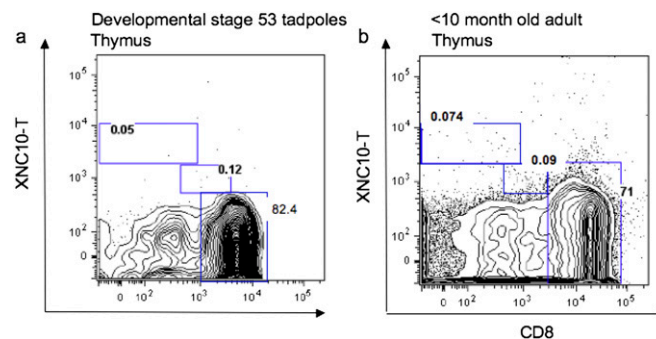

**Fig. 53.** No detectable XNC10-T<sup>+</sup>-cell populations in the thymus of either larval or adult *X. laevis*. Flow cytometry of thymocytes either (A) pooled from four stage 53 tadpoles or (B) isolated from a single adult unprimed *X. laevis*. Cells were double stained with streptavidine-APC-conjugated XNC10-T and CD8-specific mAb and gated on live cells. Percentage of positive staining cells is indicated in the scatterplot. Data are representative of three independent experiments.

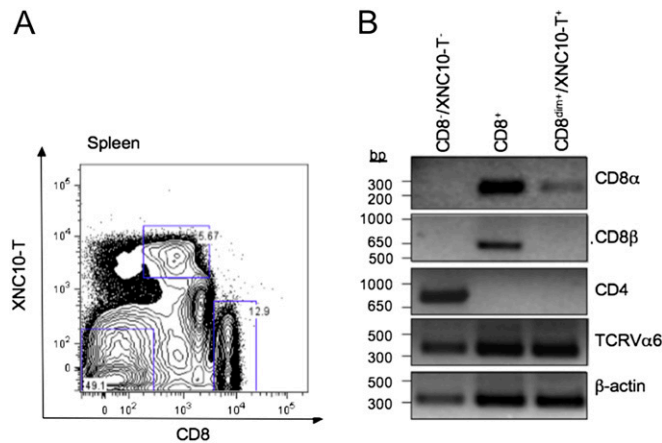

**Fig. 54.** Identification of CD8 expressing type II XNC10-T<sup>+</sup> cells. (A) Flow cytometry of spleen leukocytes isolated from adult unprimed *X. laevis* (1 y), gated on live cells, and double stained with streptavidine-phycoerythrin-conjugated XNC10-T and CD8 mAb. Sorting gates and percentages of cells are indicated in the plot. (B) Gene expression profiles of sorted XNC10-T<sup>+</sup>CD8<sup>dim+</sup> cells, CD8<sup>+</sup> and XNC10-T<sup>-</sup>CD8<sup>-</sup> double negative cells from spleen leukocytes, actin, and loading control: CD8α, CD8β, CD4, and TCRVα6.

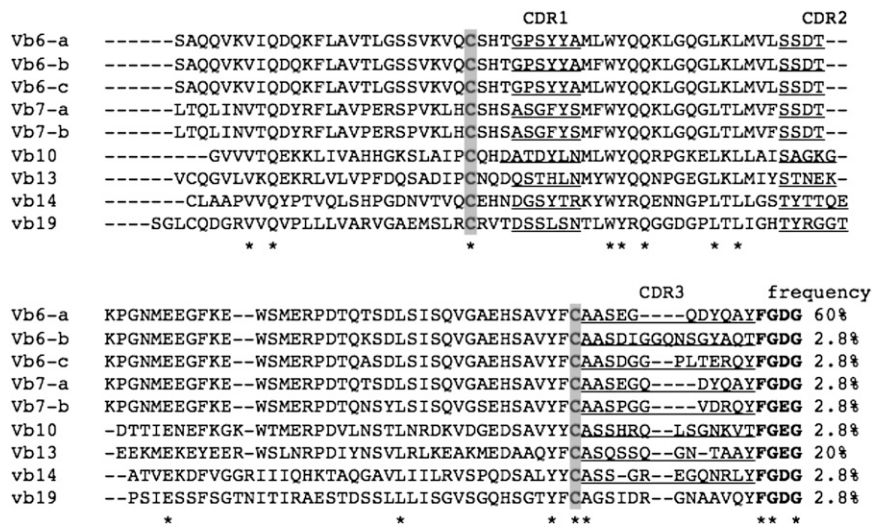

**Fig. 55.** TCR rearrangements isolated from XNC10-T<sup>+</sup> populations. Amino acid alignment of TCR rearrangements isolated from XNC10-T<sup>+</sup> populations sorted from adult spleen. CDRs are underlined and indicated at the top of the sequence. Conserved Cys-23 and -104 are highlighted in gray; the glycine bulge motif in the J region is bold, and residues conserved in all sequences are indicated by asterisks. The frequency of each V-D-J rearrangement in the XNC10-T<sup>+</sup> population is indicated at the end of the sequence.





**Table S1. TCR V $\alpha$ -J $\alpha$  and V $\beta$ -D $\beta$ -J $\beta$  genes use by XNC10-T<sup>dim+</sup> type II cells**

| V $\alpha$                                                                            | n-nucleotides         | J $\alpha$          | CDR3              | Amino acids  | Clones |
|---------------------------------------------------------------------------------------|-----------------------|---------------------|-------------------|--------------|--------|
| TCR V $\alpha$ -J $\alpha$ gene use by XNC10-T <sup>dim+</sup> type II cells          |                       |                     |                   |              |        |
| V $\alpha$ 6                                                                          |                       |                     |                   |              |        |
| CAAS                                                                                  | —                     | DTGGSTKLTFGKGTKLTVL | J $\alpha$ 1.43   | 12           | 15     |
| V $\alpha$ 15.2                                                                       |                       |                     |                   |              |        |
| CAVS                                                                                  | —                     | YSGNNLKLIFGSGTQLIVH | J $\alpha$ 1.20   | 12           | 2      |
| V $\alpha$ 3.5                                                                        |                       |                     |                   |              |        |
| CAV                                                                                   | —                     | EFSGSKLIFGSGTELIVQ  | J $\alpha$ 1.10   | 10           | 1      |
| V $\alpha$ 28                                                                         |                       |                     |                   |              |        |
| CAVS                                                                                  | —                     | YSGSGWELNFGSGTQLIVQ | J $\alpha$ 1.14   | 12           | 1      |
| V $\alpha$ 14                                                                         |                       |                     |                   |              |        |
| CGVR                                                                                  | <i>g</i>              | YGASDKLVFGKGTILSVTA | J $\alpha$ 1.47   | 11           | 1      |
| V $\alpha$ 46.1                                                                       |                       |                     |                   |              |        |
| CAVS                                                                                  | <i>gt</i>             | TGGWKYVFGSGTRLKVL   | J $\alpha$ 1.11   | 11           | 1      |
| CAFRDE                                                                                | <i>ggg</i>            | AGSVGKLIFGSGTRLIIQ  | J $\alpha$ 1.18   | 14           | 3      |
| V $\alpha$ 3.1                                                                        |                       |                     |                   |              |        |
| CAVSA                                                                                 | <i>gca</i>            | YGSKLTMGLGTVLFVR    | J $\alpha$ 1.53   | 11           | 2      |
| V $\beta$                                                                             | n-D $\beta$ -n        | J $\beta$           | CDR3              | Amino acids  | Clones |
| TCR V $\beta$ -D $\beta$ -J $\beta$ gene use by XNC10-T <sup>dim+</sup> type II cells |                       |                     |                   |              |        |
| V $\beta$ 1.1                                                                         |                       |                     |                   |              |        |
| CAATS                                                                                 | <i>cgggacaggggggg</i> | D $\beta$ 2         | TNERQYFGDGILTIVL  | J $\beta$ 8  | 15     |
| V $\beta$ 1.2                                                                         |                       |                     |                   |              |        |
| CAA                                                                                   | <i>ccactggag</i>      | D $\beta$ 1         | TAAYFGEGTVLTVL    | J $\beta$ 3  | 9      |
| V $\beta$ 2                                                                           |                       |                     |                   |              |        |
| CAWS                                                                                  | <i>agaggacaggggga</i> | D $\beta$ 2         | NYQAYFGDGILTIVL   | J $\beta$ 13 | 13     |
| V $\beta$ 3                                                                           |                       |                     |                   |              |        |
| CAWS                                                                                  | <i>cgcgacaggc</i>     | D $\beta$ 2         | TADRLYFGDGILTIVL  | J $\beta$ 9  | 12     |
| V $\beta$ 6                                                                           |                       |                     |                   |              |        |
| CAASE                                                                                 | <i>gggacagg</i>       | D $\beta$ 2         | DYQAYFGDGILTIVL   | J $\beta$ 13 | 11     |
| V $\beta$ 9                                                                           |                       |                     |                   |              |        |
| CASSH                                                                                 | <i>ccgacaact</i>      | D $\beta$ 2         | SGNKVTFEGEGTILHVL | J $\beta$ 2  | 13     |
| CAVS                                                                                  | <i>gagacaggggtggg</i> | D $\beta$ 2         | DRQYFGEGTILTVL    | J $\beta$ 8  | 12     |
| V $\beta$ 16                                                                          |                       |                     |                   |              |        |
| CAASK                                                                                 | <i>gggacat</i>        | D $\beta$ 2         | TTERQYFGDGILTIVL  | J $\beta$ 6  | 12     |
| V $\beta$ 18                                                                          |                       |                     |                   |              |        |
| CTSS                                                                                  | <i>acgacaga</i>       | D $\beta$ 2         | NYQAYFGDGILTIVL   | J $\beta$ 13 | 11     |
| CTSS                                                                                  | <i>taggggggggtg</i>   | D $\beta$ 2         | ANTAAYFGEGTVLTVL  | J $\beta$ 3  | 13     |
| CTSS                                                                                  | <i>taggggggggtg</i>   | D $\beta$ 2         | AAYFGEGTVLTVF     | J $\beta$ 3  | 13     |
| V $\beta$ 20                                                                          |                       |                     |                   |              |        |
| CAAS                                                                                  | <i>gggggggggg</i>     | D $\beta$ 2         | DYQAYFGDGILTIVL   | J $\beta$ 13 | 11     |
| CASSI                                                                                 | <i>cgcgacaggc</i>     | D $\beta$ 2         | TERQYFGDGILTIVL   | J $\beta$ 6  | 13     |

RNA from sorted type II XNC10-T<sup>dim+</sup> cells was subjected to 5'-RACE using TCR $\alpha$  and - $\beta$  constant region primers; 26 TCR $\alpha$  clones and 30 TCR $\beta$  clones were sequenced. Nongerm line-encoded nucleotides are shown. Residues in the CDR3 $\alpha$  region conserved with the invariant V $\alpha$ 6-J $\alpha$ 1.43 rearrangement (Gly-110, Lys-115, and Leu-116) are bold. The CDR3 region is defined according to the International Immunogenetics numbering (1). Number of clones signifies the number of sequences with identical nucleotide sequences.

1. Lefranc MP, et al. (2003) IMGT unique numbering for immunoglobulin and T cell receptor variable domains and Ig superfamily V-like domains. *Dev Comp Immunol* 27(1):55–77.

**Table S2. TCR V $\alpha$ -J $\alpha$  gene usage by CD8<sup>+</sup> cells**

| V $\alpha$                      | n-nucleotides | J $\alpha$           | CDR3            | (aa) | Clones |
|---------------------------------|---------------|----------------------|-----------------|------|--------|
| <b>V<math>\alpha</math>25</b>   |               |                      |                 |      |        |
| CALRS                           | -             | DGYKYTFGSGTQLIVI     | J $\alpha$ 1.16 | 10   | 2      |
| CALRS                           | <i>ct</i>     | NYGASNKLIFGPGTKINVK  | J $\alpha$ 1.2  | 14   | 1      |
| CALRR                           | -             | DTGGRALTFGKGTQINVM   | J $\alpha$ 1.27 | 12   | 1      |
| CALRR                           | -             | TGGRALTFGKGTQINVM    | J $\alpha$ 1.27 | 11   | 1      |
| CALRR                           | -             | ATGTVGKLIFGSGTRLIIQ  | J $\alpha$ 1.18 | 13   | 1      |
| <b>V<math>\alpha</math>46.1</b> |               |                      |                 |      |        |
| CALSD                           | <i>cgc</i>    | NAGFSKLVFGKGTQLLIT   | J $\alpha$ 1.17 | 13   | 2      |
| CALSDA                          | <i>g</i>      | SYASKVLFGTGTLTVRS    | J $\alpha$ 1.4  | 12   | 1      |
| CALSDA                          | -             | AYSGSGWELNFGSGTQLIVQ | J $\alpha$ 1.14 | 15   | 1      |
| CALTDAA                         | -             | TGYSKLVFGKGTQLVIL    | J $\alpha$ 1.13 | 13   | 1      |
| <b>V<math>\alpha</math>39</b>   |               |                      |                 |      |        |
| CALRE                           | <i>a</i>      | AYTGTGKLVFGSGTRLIIQ  | J $\alpha$ 1.18 | 14   | 1      |
| CALR                            | -             | DFVTDKLVFGIGTILLVN   | J $\alpha$ 1.1  | 11   | 1      |
| CAL                             | <i>ag</i>     | SAATKLIFGEGTQLNVR    | J $\alpha$ 1.26 | 10   | 1      |
| <b>V<math>\alpha</math>23</b>   |               |                      |                 |      |        |
| CALSD                           | <i>ggg</i>    | DTAGRTLTFGKGTQINVM   | J $\alpha$ 1.24 | 13   | 1      |
| CALRDA                          | <i>ag</i>     | NWGTGNKIIFGGGTFLLTVL | J $\alpha$ 2.1  | 15   | 1      |
| <b>V<math>\alpha</math>18.1</b> |               |                      |                 |      |        |
| CAVS                            | <i>t</i>      | VEQSNYRLHFHGIGTRLLVR | J $\alpha$ 1.49 | 12   | 1      |
| <b>V<math>\alpha</math>3.2</b>  |               |                      |                 |      |        |
| CAV                             | <i>cccc</i>   | YGGGNYKLTFGSGTKLIVT  | J $\alpha$ 1.8  | 13   | 1      |
| <b>V<math>\alpha</math>32</b>   |               |                      |                 |      |        |
| CATD                            | -             | DAGAGSKLVFGTGKLSVF   | J $\alpha$ 1.32 | 12   | 1      |
| <b>V<math>\alpha</math>12</b>   |               |                      |                 |      |        |
| CAASD                           | <i>tgg</i>    | TGYGSKLTMGLGTVLFVR   | J $\alpha$ 1.53 | 13   | 1      |
| <b>V<math>\alpha</math>28</b>   |               |                      |                 |      |        |
| CAVS                            | -             | DGGGNYKLTFGSGTKLIVT  | J $\alpha$ 1.8  | 12   | 1      |
| <b>V<math>\alpha</math>41</b>   |               |                      |                 |      |        |
| CALSD                           | -             | AGAGLKQTFGTGKLSVF    | J $\alpha$ 1.32 | 12   | 1      |
| <b>V<math>\alpha</math>42</b>   |               |                      |                 |      |        |
| CAVVA                           | <i>ag</i>     | AAGRTLTFGKGTQINVM    | J $\alpha$ 1.24 | 11   | 1      |
| <b>V<math>\alpha</math>3.4</b>  |               |                      |                 |      |        |
| CAV                             | <i>taa</i>    | SYTAGSKVIFGKGTILTVN  | J $\alpha$ 1.19 | 12   | 1      |
| <b>V<math>\alpha</math>29</b>   |               |                      |                 |      |        |
| CALRP                           | <i>g</i>      | ANAGAGLKQTFGTGKLSVF  | J $\alpha$ 1.32 | 14   | 1      |
| <b>V<math>\alpha</math>17</b>   |               |                      |                 |      |        |
| CAMR                            | <i>t</i>      | SYTAGSKIIFGKGTILTVN  | J $\alpha$ 1.19 | 13   | 1      |
| <b>V<math>\alpha</math>54</b>   |               |                      |                 |      |        |
| CALSA                           | -             | DVGGFKLVFGSGTKLNVK   | J $\alpha$ 1.9  | 12   | 1      |
| <b>V<math>\alpha</math>3.3</b>  |               |                      |                 |      |        |
| CAVR                            | <i>gg</i>     | ASYASKVLFGTGTLTVRS   | J $\alpha$ 1.4  | 11   | 1      |
| <b>V<math>\alpha</math>31</b>   |               |                      |                 |      |        |
| CAVS                            | <i>ag</i>     | DGYKYTFGSGTQLIVI     | J $\alpha$ 1.16 | 10   | 1      |
| <b>V<math>\alpha</math>24</b>   |               |                      |                 |      |        |
| CALSD                           | <i>g</i>      | GAGFGKLVFGKGTQLLIT   | J $\alpha$ 1.17 | 12   | 1      |
| <b>V<math>\alpha</math>3.1</b>  |               |                      |                 |      |        |
| CAVS                            | <i>ccc</i>    | NNYGKLVFGKGTILFVK    | J $\alpha$ 1.3  | 11   | 1      |

RNA from sorted CD8<sup>+</sup> cells was subjected to 5'-RACE using TCR $\alpha$  constant region primer; 31 TCR $\alpha$  clones were sequenced. Each V $\alpha$  family and subfamily is boldfaced. Non-germline encoded nucleotides are shown in italic. Number of clones signifies number of sequences with identical nucleotide sequences. The CDR3 region is defined as according to the International IMGT (1).

1. Lefranc MP, et al. (2003) IMGT unique numbering for immunoglobulin and T cell receptor variable domains and Ig superfamily V-like domains. *Dev Comp Immunol* 27(1):55-77.





**Table S4. TCR V $\alpha$ -J $\alpha$  and V $\beta$ -D $\beta$ -J $\beta$  gene use by type I XNC10-T<sup>+</sup> cells**

| V $\alpha$                                                                        | n-nucleotides        | D $\beta$   | J $\alpha$         | CDR3            | Amino acids | Clones |
|-----------------------------------------------------------------------------------|----------------------|-------------|--------------------|-----------------|-------------|--------|
| TCR V $\alpha$ -J $\alpha$ gene use by type I XNC10-T <sup>+</sup> cells          |                      |             |                    |                 |             |        |
| <b>V<math>\alpha</math>6</b>                                                      |                      |             |                    |                 |             |        |
| CAASD                                                                             | —                    |             | TGGSTKLTFGKGTCLTVL | J $\alpha$ 1.43 | 12          | 35     |
| TCR V $\beta$ -D $\beta$ -J $\beta$ gene use by type I XNC10-T <sup>+</sup> cells |                      |             |                    |                 |             |        |
| <b>V<math>\beta</math>6</b>                                                       |                      |             |                    |                 |             |        |
| CAASE                                                                             | <i>gggacagg</i>      | D $\beta$ 2 | DYQAYFGDGTILTVL    | J $\beta$ 13    | 11          | 21     |
| CAASD                                                                             | <i>atcggaggacaaa</i> |             | NSGYAQTFGDGTLLTVL  | J $\beta$ 10    | 15          | 1      |
| CAASD                                                                             | <i>ggggggccct</i>    |             | TERQYFGDGTILTVL    | J $\beta$ 6     | 13          | 1      |
| <b>V<math>\beta</math>7</b>                                                       |                      |             |                    |                 |             |        |
| CAASE                                                                             | <i>gggacagg</i>      | D $\beta$ 2 | DYQAYFGDGTILTVL    | J $\beta$ 13    | 11          | 1      |
| CAAS                                                                              | <i>ccaggggggt</i>    | D $\beta$ 2 | DRQYFGEGTILTVL     | J $\beta$ 8     | 11          | 1      |
| <b>V<math>\beta</math>13</b>                                                      |                      |             |                    |                 |             |        |
| CASQS                                                                             | <i>gccagggg</i>      | D $\beta$ 2 | NTAAYFGEGTVLTVL    | J $\beta$ 3     | 12          | 7      |
| <b>V<math>\beta</math>10</b>                                                      |                      |             |                    |                 |             |        |
| CASSH                                                                             | <i>ccgacaact</i>     | D $\beta$ 2 | SGNKVTFEGEGLHVL    | J $\beta$ 2     | 13          | 1      |
| <b>V<math>\beta</math>14</b>                                                      |                      |             |                    |                 |             |        |
| CASS                                                                              | <i>gpcagggga</i>     | D $\beta$ 2 | GQNRLYFGDGTIVTVL   | J $\beta$ 11    | 12          | 1      |
| <b>V<math>\beta</math>19</b>                                                      |                      |             |                    |                 |             |        |
| CAGS                                                                              | <i>tcgacagggg</i>    | D $\beta$ 2 | NAAVQYFGDGTIVTVL   | J $\beta$ 5     | 13          | 1      |

RNA from sorted type I XNC10-T<sup>+</sup> cells was subjected to 5'-RACE using TCR $\alpha$  and - $\beta$  constant region primers, and 35 clones from each reaction were sequenced. CDR3 $\alpha$  residues conserved in the type II cells (Gly-110, Lys-115, and Leu-116) are bold. Representative TCR $\alpha$  and - $\beta$  repertoires from sorted type II XNC10-T<sup>dim+</sup> and CD8<sup>+</sup> cells are shown in Tables S1 and S2. CDR3 regions are determined according to the IMGT numbering for TCR V domains (1). Number of clones signifies the number of sequences with identical nucleotide sequences.

1. Lefranc MP, et al. (2003) IMGT unique numbering for immunoglobulin and T cell receptor variable domains and Ig superfamily V-like domains. *Dev Comp Immunol* 27(1):55–77.

**Table S5. TCR V $\beta$ -D $\beta$ -J $\beta$  gene use by CD8<sup>+</sup> cells**

| V $\beta$                     | n-D $\beta$ -n          | D $\beta$   | J $\beta$         | CDR3         | Amino acids | Clones |
|-------------------------------|-------------------------|-------------|-------------------|--------------|-------------|--------|
| <b>V<math>\beta</math>1.1</b> |                         |             |                   |              |             |        |
| CAA                           | <i>tggaca</i>           | D $\beta$ 2 | SANTAAYFGEGTVLTVL | J $\beta$ 3  | 11          | 1      |
| CAA                           | <i>ccccgggacagggggg</i> | D $\beta$ 2 | ERQYFGDGTILTVL    | J $\beta$ 7  | 12          | 3      |
| <b>V<math>\beta</math>1.2</b> |                         |             |                   |              |             |        |
| CAASD                         | <i>gggggggagg</i>       | D $\beta$ 1 | TNTAAYFGEGTVLTVL  | J $\beta$ 3  | 12          | 2      |
| <b>V<math>\beta</math>1.3</b> |                         |             |                   |              |             |        |
| CAA                           | <i>aaaaat</i>           |             | TGQAQYFGDGTILTVL  | J $\beta$ 4  | 10          | 1      |
| CAVSI                         | <i>tcggca</i>           | D $\beta$ 2 | NDRQYFGEGTILTVL   | J $\beta$ 3  | 11          | 1      |
| <b>V<math>\beta</math>4</b>   |                         |             |                   |              |             |        |
| CAAS                          | <i>acaggggt</i>         | D $\beta$ 2 | NDRQYFGEGTILTVL   | J $\beta$ 8  | 11          | 1      |
| <b>V<math>\beta</math>5</b>   |                         |             |                   |              |             |        |
| CAASI                         | <i>gatggggg</i>         | D $\beta$ 1 | YQAYFGDGTILTVL    | J $\beta$ 13 | 11          | 1      |
| <b>V<math>\beta</math>6</b>   |                         |             |                   |              |             |        |
| CAASD                         | <i>gggacaggggg</i>      | D $\beta$ 2 | GYAQTFGDGTLLTVL   | J $\beta$ 10 | 13          | 1      |
| CAASE                         | <i>gggacagg</i>         | D $\beta$ 2 | DYQAYFGDGTILTVL   | J $\beta$ 13 | 11          | 1      |
| <b>V<math>\beta</math>7</b>   |                         |             |                   |              |             |        |
| CAASE                         | <i>agg</i>              |             | NERQYFGDGTILTVL   | J $\beta$ 7  | 10          | 1      |
| CAAS                          | <i>ccacgggacaatt</i>    | D $\beta$ 2 | NAAVQYFGDGTILTVL  | J $\beta$ 5  | 13          | 1      |
| CAA                           | <i>gggacaggggg</i>      | D $\beta$ 2 | TTERQYFGDGTILTVL  | J $\beta$ 6  | 12          | 1      |
| <b>V<math>\beta</math>8</b>   |                         |             |                   |              |             |        |
| CAVSI                         | <i>atcgacaagt</i>       |             | TGQAQYFGDGTILTVL  | J $\beta$ 4  | 13          | 1      |
| CAVSI                         | <i>tcggcag</i>          |             | NDRQYFGEGTILTVL   | J $\beta$ 8  | 11          | 1      |
| <b>V<math>\beta</math>9</b>   |                         |             |                   |              |             |        |
| CAVSM                         | <i>ggactgggggagcctc</i> | D $\beta$ 1 | PNTAAYFGEGTVLTVL  | J $\beta$ 3  | 15          | 1      |
| CAV                           | <i>gggacatct</i>        | D $\beta$ 2 | SSGNKVTFEGGTLHVL  | J $\beta$ 2  | 12          | 1      |
| <b>V<math>\beta</math>13</b>  |                         |             |                   |              |             |        |
| CASQS                         | <i>ccgggacagt</i>       | D $\beta$ 2 | TNDRQYFGEGTILTVL  | J $\beta$ 8  | 13          | 1      |
| CASQ                          | <i>gaggacagggag</i>     | D $\beta$ 2 | NDRQYFGEGTILTVL   | J $\beta$ 8  | 12          | 2      |
| CASQ                          | <i>ccccgacaggggg</i>    | D $\beta$ 2 | AYSAAYFGEGTIVSVL  | J $\beta$ 12 | 13          | 1      |
| CASQS                         | <i>tacagggg</i>         | D $\beta$ 2 | TYSAAYFGEGTIVSVL  | J $\beta$ 12 | 13          | 1      |
| CASQ                          | <i>ccccgggacagggggg</i> | D $\beta$ 2 | DERQYFGDGTILTVL   | J $\beta$ 7  | 13          | 1      |
| <b>V<math>\beta</math>14</b>  |                         |             |                   |              |             |        |
| CASSI                         | <i>aggggggagcg</i>      | D $\beta$ 1 | AYFGEGTVLTVL      | J $\beta$ 3  | 10          | 1      |
| CASS                          | <i>tatcggggggggcg</i>   |             | DYQAYFGDGTILTVL   | J $\beta$ 13 | 12          | 1      |
| CVSS                          | <i>ccgac</i>            |             | SDRAQYFGEGTRLLVL  | J $\beta$ 1  | 11          | 1      |
| CASSI                         | <i>ggggggggcg</i>       |             | DYQAHFGDGTILTVL   | J $\beta$ 13 | 12          | 1      |
| <b>V<math>\beta</math>15</b>  |                         |             |                   |              |             |        |
| CSASL                         | <i>aaacaggcaat</i>      | D $\beta$ 2 | YSGYAQTFGDGTLLTVL | J $\beta$ 10 | 14          | 1      |
| <b>V<math>\beta</math>16</b>  |                         |             |                   |              |             |        |
| CAAS                          | <i>ccgggacaggggg</i>    | D $\beta$ 2 | AGQTQYFGDGTILTVL  | J $\beta$ 4  | 13          | 1      |
| CASQ                          | <i>ccgggacagt</i>       | D $\beta$ 2 | TNDRQYFGEGTILTVL  | J $\beta$ 7  | 13          | 1      |
| <b>V<math>\beta</math>17</b>  |                         |             |                   |              |             |        |
| CASST                         | <i>gggcagat</i>         |             | NDRQYFGEGTILTVL   | J $\beta$ 8  | 12          | 1      |
| CASST                         | <i>ggggggcccggg</i>     |             | AYFGEGTVLTVL      | J $\beta$ 3  | 10          | 1      |
| <b>V<math>\beta</math>19</b>  |                         |             |                   |              |             |        |
| CAGST                         | <i>gggggagg</i>         |             | AAVQYFGDGTILTVL   | J $\beta$ 5  | 12          | 1      |
| CAGST                         | <i>gacagt</i>           | D $\beta$ 2 | TNERQYFGDGTILTVL  | J $\beta$ 7  | 12          | 1      |

RNA from sorted XNC10-T<sup>+</sup>/CD8<sup>+</sup> cells was subjected to 5'-RACE using TCR $\beta$  constant region primers; 36 TCR $\beta$  clones were sequenced clones. Nongerm line-encoded nucleotides are shown. The CDR3 region is defined according to the IMGT numbering (1). The number of clones signifies the number of sequences with identical nucleotide sequences.

1. Lefranc MP, et al. (2003) IMGT unique numbering for immunoglobulin and T cell receptor variable domains and Ig superfamily V-like domains. *Dev Comp Immunol* 27(1):55-77.



Table S6. Cont.

| V $\alpha$ family                       | No. of sequences | Total population (%) identified V $\alpha$ segments |
|-----------------------------------------|------------------|-----------------------------------------------------|
| V $\alpha$ 74                           | 88               | 0.4420999751                                        |
| V $\alpha$ 75                           | 60               | 0.3014318011                                        |
| V $\alpha$ 76                           | 316              | 1.5875408191                                        |
| V $\alpha$ 77                           | 27               | 0.135644311                                         |
| V $\alpha$ 78                           | 675              | 3.3911077621                                        |
| V $\alpha$ 79                           | 156              | 0.7837226831                                        |
| V $\alpha$ 80                           | 543              | 2.72795781                                          |
| V $\alpha$ 81                           | 120              | 0.6028636021                                        |
| V $\alpha$ 82                           | 14               | 0.0703340871                                        |
| V $\alpha$ 83                           | 10               | 0.0502386341                                        |
| Other V $\alpha$                        |                  |                                                     |
| 36 different with >10 sequences/cluster | 73               | 0.366742025                                         |
| Total                                   | 19,905           | 100                                                 |

Table S7. Primers used in the study

| Primer identification | 5'-3' sequence                                                                   |
|-----------------------|----------------------------------------------------------------------------------|
| $\beta$ 2-m F         | <u>tcaaagcttggagagtaacattagtccccg*</u>                                           |
| $\beta$ 2-m R         | <u>acagaattcgaaaatgtccagctctgtactt*</u>                                          |
| XNC10 $\alpha$ 1 F    | <u>tcaaagcttgggagcagtcacattttccaatacagcacaacactggtttcagatc*</u>                  |
| XNC10 $\alpha$ 3 R    | <u>acagaattcgtgcccattctgagcttcgaagatgtcg ttcaaacaccaaagtgtacaatcaggggattctc*</u> |
| CD8 $\alpha$ F        | aagccacctacgactaccacaa <sup>†</sup>                                              |
| CD8 $\alpha$ R        | ccgttcttctcagctcaggcaca <sup>†</sup>                                             |
| CD8 $\beta$ F         | tcatcatctctttctggggc <sup>†</sup>                                                |
| CD8 $\beta$ R         | aattcagtggtgcttctctg <sup>†</sup>                                                |
| CD4 F                 | tccatctctgacatccccctc <sup>†</sup>                                               |
| CD4 R                 | tcaccagacacagtcatt <sup>†</sup>                                                  |
| TCR $\alpha$ C R2     | agtgaccaggcacacagattcagg <sup>†‡</sup>                                           |
| TCR $\alpha$ C R1     | gtcagctttgaggcgatacattg <sup>§</sup>                                             |
| TCR $\beta$ C R       | caagtagccatggtcagctgttcc <sup>†</sup>                                            |
| V $\alpha$ 6-F1       | ggctcttatggacagaatgttcag <sup>†</sup>                                            |
| GAPDH F               | acccttcatcgacttggac <sup>†</sup>                                                 |
| GAPDH R               | ggagccagacagttttagtg <sup>†</sup>                                                |
| $\beta$ -actin F      | ggtgtcatggttgaatgg <sup>†</sup>                                                  |
| $\beta$ -actin R      | tgggttacaccatcacctgag <sup>†</sup>                                               |
| TCR $\alpha$ C A12    | ccatctcatccctgcgtgtctccgactcagagcgtctcaagctttgaggcgatacattgaag <sup>¶</sup>      |
| TCR $\alpha$ C D12    | ccatctcatccctgcgtgtctccgactcagctgactgacaagctttgaggcgatacattgaag <sup>¶</sup>     |
| TCR $\alpha$ C D12    | ccatctcatccctgcgtgtctccgactcaggtctagtgcaagctttgaggcgatacattgaag <sup>¶</sup>     |
| XNC10 F               | cgccatcgacttcttctt <sup>  </sup>                                                 |
| XNC10 R               | tctcaacaccagcttcttctt <sup>  </sup>                                              |
| V $\alpha$ 6 F2       | caaccgctacccatcttct <sup>¶  </sup>                                               |
| J $\alpha$ 1.43R      | gagtttgggtggaacccccagt <sup>¶  </sup>                                            |
| GAPDH F               | gacatcaaggccgacattaagact <sup>  </sup>                                           |
| GAPDH R               | agatggaggagtgagtgaccat <sup>  </sup>                                             |

\*Expression of  $\beta$ 2-m-XNC0.<sup>†</sup>RT-PCR.<sup>‡</sup>5'-RACE.<sup>§</sup>Nested RT-PCR<sup>¶</sup>Deep sequencing.<sup>||</sup>Quantitative PCR.
